# Supplementary material for: Our Faces in the Dog's Brain: Functional Imaging Reveals Temporal Cortex Activation during Perception of Human Faces
Source: PubMed Central journal article supplement (PMC4774982; doi:10.1371/journal.pone.0149431), 2016-03-02
Supplement: pone.0149431.s004.pdf [file pone.0149431.s004.pdf]

| Cluster  | Local Maxima | Z-Max | X   | Y   | Z   |
|----------|--------------|-------|-----|-----|-----|
| Temporal | T1           | 2.96  | 93  | 139 | 102 |
|          | T2           | 2.8   | 127 | 186 | 112 |
|          | T3           | 2.76  | 132 | 184 | 112 |
|          | T4           | 2.75  | 135 | 182 | 111 |
|          | T5           | 2.74  | 132 | 181 | 111 |
|          | T6           | 2.73  | 118 | 133 | 135 |
| Frontal  | F1           | 2.87  | 170 | 179 | 139 |
|          | F2           | 2.87  | 170 | 182 | 140 |
|          | F3           | 2.83  | 172 | 173 | 139 |
|          | F4           | 2.81  | 169 | 172 | 134 |
|          | F5           | 2.81  | 168 | 172 | 131 |
|          | F6           | 2.75  | 158 | 162 | 156 |
