# Supplementary material for: Our Faces in the Dog's Brain: Functional Imaging Reveals Temporal Cortex Activation during Perception of Human Faces
Source: PubMed Central journal article supplement (PMC4774982; doi:10.1371/journal.pone.0149431), 2016-03-02
Supplement: pone.0149431.s005.pdf [file pone.0149431.s005.pdf]

| Participant | Left hemisphere |     |     |     |  | Right hemisphere |     |     |     |
|-------------|-----------------|-----|-----|-----|--|------------------|-----|-----|-----|
|             | Z-<br>Max       | X   | Y   | Z   |  | Z-<br>Max        | X   | Y   | Z   |
| Hera        | 3.3             | 89  | 154 | 111 |  | 2.6              | 182 | 152 | 108 |
| Kora        | 3.8             | 63  | 130 | 113 |  | 3.5              | 182 | 112 | 136 |
| Kun-kun     | 2.6             | 108 | 146 | 97  |  | 3.9              | 165 | 143 | 95  |
| Morante     | 3.1             | 81  | 135 | 129 |  | 3.8              | 192 | 127 | 106 |
| Morris      | 3.4             | 95  | 142 | 95  |  | 3.2              | 165 | 154 | 86  |
| Odín        | 2.5             | 67  | 118 | 141 |  | 2.6              | 162 | 134 | 84  |
| Zilla       | 3.3             | 73  | 121 | 104 |  | 3.4              | 198 | 131 | 139 |
